# Supplementary material for: Water splitting with polyoxometalate-treated photoanodes: enhancing performance through sensitizer design
Source: PubMed Central journal article supplement — Chem Sci. 2015 Jun 11;6(10):5531–43. doi: 10.1039/c5sc01439e (PMC5949860; doi:10.1039/c5sc01439e), 2015-06-11
Supplement: SC-006-C5SC01439E-s001.pdf [file SC-006-C5SC01439E-s001.pdf]

*Electronic Supplementary Information For:*

## **Water Splitting with Polyoxometalate-Treated Photoanodes: Enhancing Performance through Sensitizer Design**

John Fielden, Jordan M. Sumliner, Nannan Han, Yurii V. Geletii, Xu Xiang, Djamaladdin G. Musaev, Tianquan Lian and Craig L. Hill.

### **Contents**

The electronic supplementary information has been organized in the order that items are discussed in the main paper

|            |                                                                                                                                     |           |
|------------|-------------------------------------------------------------------------------------------------------------------------------------|-----------|
| <b>1.</b>  | Comments on the Synthesis of H <sub>2</sub>                                                                                         | <b>2</b>  |
| <b>2.</b>  | Crystallographic Bond Lengths and Extended Structure                                                                                | <b>3</b>  |
| <b>3.</b>  | UV-vis spectra and Cyclic Voltammograms of [Et <sub>4</sub> ][PF <sub>6</sub> ] <sub>2</sub> in the presence and absence of cations | <b>4</b>  |
| <b>4.</b>  | Typical UV-vis Spectra of Films: Summary of Dye and Catalyst Loadings                                                               | <b>5</b>  |
| <b>5.</b>  | Ultrafast Visible TAS – Variation of Catalyst Loading and pH                                                                        | <b>5</b>  |
| <b>6.</b>  | Photoelectrochemical Control Experiments                                                                                            | <b>6</b>  |
| <b>7.</b>  | Extended Photoelectrochemical Experiments                                                                                           | <b>8</b>  |
| <b>8.</b>  | Transient Visible Spectroscopy of H <sub>2</sub> in Aqueous Solution                                                                | <b>9</b>  |
| <b>9.</b>  | UV-vis Spectra of Dyes and Catalyst <b>1</b> at High and Low pH                                                                     | <b>10</b> |
| <b>10.</b> | UV-vis Spectra of Buffers from Desorption Experiments: Calculation of Lost Dye and Catalyst                                         | <b>10</b> |
| <b>11.</b> | Evolution of Photoelectrode Absorbance Loss with Time                                                                               | <b>12</b> |
| <b>12.</b> | Experimental Details                                                                                                                | <b>12</b> |
|            | a. Synthesis                                                                                                                        | <b>12</b> |
|            | b. X-Ray Crystal Structure Determination                                                                                            | <b>14</b> |
|            | c. Laser Photophysical Measurements                                                                                                 | <b>15</b> |
|            | d. Photoelectrochemistry                                                                                                            | <b>16</b> |
| <b>13.</b> | References                                                                                                                          | <b>18</b> |

## 1. Comments on the Synthesis of H<sub>2</sub>2

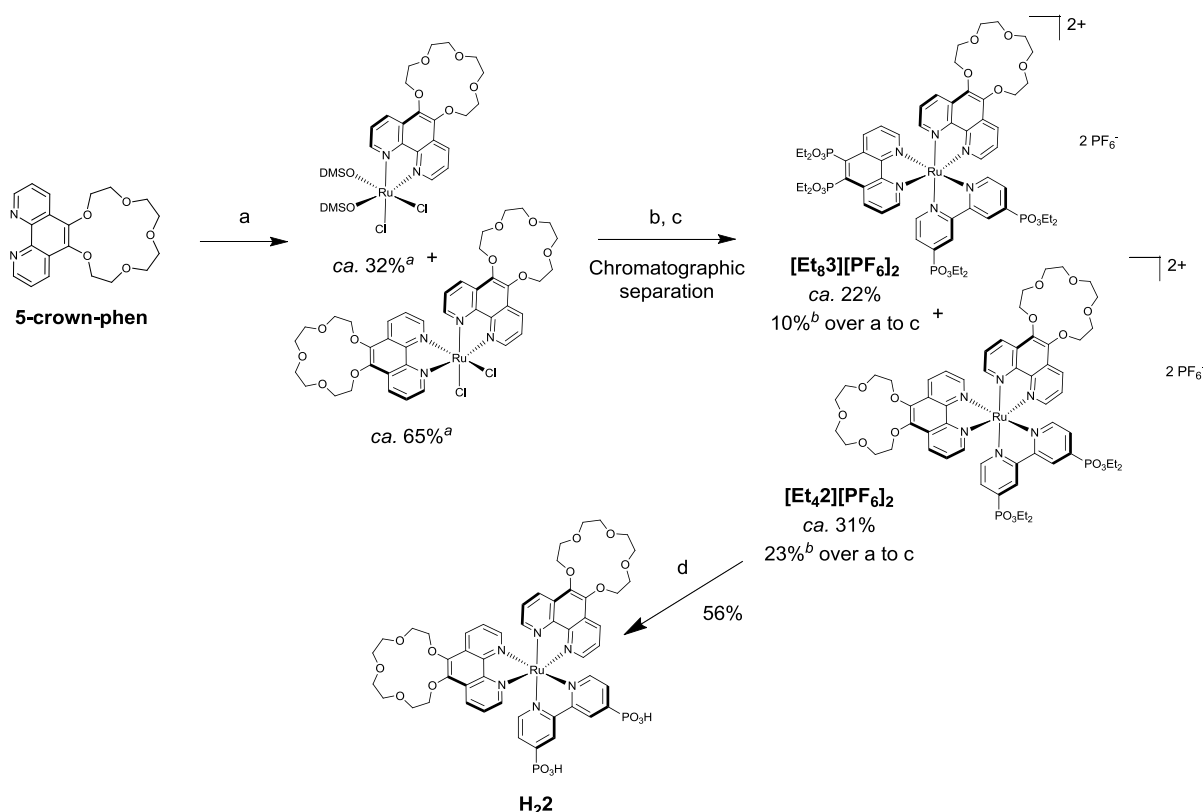

**Scheme S1** Synthesis of H<sub>2</sub>2. Reagents and conditions: (a) Ru(DMSO)<sub>4</sub>Cl<sub>2</sub>, [NMe<sub>4</sub>]Cl, DMF, 120 °C, 4 h; (b) Et<sub>4</sub>dpbpy, EtOH/H<sub>2</sub>O, reflux, 18 h, then NH<sub>4</sub>PF<sub>6</sub>; (c) Triethylorthoacetate / MeCN, reflux, 5 h, chromatographic separation, NH<sub>4</sub>PF<sub>6</sub>; (d) 4 M HCl<sub>(aq)</sub>, reflux, 6 h. <sup>a</sup>Yield for each compound estimated from <sup>1</sup>H-NMR integration and crude mass and based on RuCl<sub>3</sub>. <sup>b</sup>Yield over steps a to c based on limiting ligand for each complex (5-crown-phen for [Et<sub>4</sub>2][PF<sub>6</sub>]<sub>2</sub>, Et<sub>4</sub>dpbpy for [Et<sub>8</sub>3][PF<sub>6</sub>]<sub>2</sub>).

H<sub>2</sub>2 is synthesized from the 5-crown-phen ligand, with either Ru(DMSO)<sub>4</sub>Cl<sub>2</sub> or RuCl<sub>3</sub> as the ruthenium starting material. However, we found that RuCl<sub>3</sub> resulted in large quantities of unidentified side products in the first step, whereas the lower temperature reaction facilitated by Ru(DMSO)<sub>4</sub>Cl<sub>2</sub> cleanly produced an approximately 2:1 mixture of [Ru(5-crown-phen)<sub>2</sub>Cl<sub>2</sub>] and [Ru(5-crown-phen)(dmsO)<sub>2</sub>Cl<sub>2</sub>]. Chromatographic separation of these complexes was inefficient, and adding more 5-crown-phen led to formation of *tris*-5-crown phen complexes, so the mixture was directly reacted with 4,4'-diphosphonic acid ethyl ester-2,2'-bipyridine (Et<sub>4</sub>dpbpy), before the partially hydrolysed phosphonic acid ester groups were re-esterified by treatment with triethylorthoacetate. The precursor [Et<sub>4</sub>2][PF<sub>6</sub>]<sub>2</sub> could then be chromatographically isolated before hydrolysis of the phosphonate esters to produce the target, which precipitates from water–acetone as doubly deprotonated, neutral H<sub>2</sub>2. The mono-crown sister compound [(Et<sub>4</sub>dpbpy)<sub>2</sub>Ru(5-crown-phen)][PF<sub>6</sub>]<sub>2</sub> ([Et<sub>8</sub>3][PF<sub>6</sub>]<sub>2</sub>) was also isolated and characterized and will be reported upon in more detail in a future manuscript. The main source of loss in this synthesis would appear to be the chromatographic separation of [Et<sub>4</sub>2][PF<sub>6</sub>]<sub>2</sub> and [Et<sub>8</sub>3][PF<sub>6</sub>]<sub>2</sub>, and potentially reprecipitation of these hydrophobic complexes from acetone-ether: the combined crude yield of [Et<sub>4-x</sub>H<sub>x</sub>2][PF<sub>6</sub>]<sub>2</sub> and [Et<sub>8-x</sub>H<sub>x</sub>3][PF<sub>6</sub>]<sub>2</sub> after step b is in the region of 65%.

## 2. Crystallographic Bond Lengths and Extended Structure

**Bond Lengths.** The Ru-N bond lengths and angles of **H<sub>2</sub>2** are summarized below (Table S2). They are typical of Ru polypyridyls, the bond lengths staying within a narrow range of 2.046(4) to 2.073(4) Å, with those to the dpbpy ligand slightly shorter than those to 5-crown-phen.

**Table S1** Bond lengths (Å) and angles (°) of the Ru coordination sphere of **H<sub>2</sub>2**

|             |          |             |          |
|-------------|----------|-------------|----------|
| Ru1-N1      | 2.073(4) | N1-Ru1-N3   | 97.4(2)  |
| Ru1-N1A     | 2.073(4) | N1A-Ru1-N3  | 171.4(2) |
| Ru1-N2      | 2.065(4) | N1-Ru1-N3A  | 171.4(2) |
| Ru1-N2A     | 2.065(4) | N1A-Ru1-N3A | 97.4(2)  |
| Ru1-N3      | 2.046(4) | N2-Ru1-N2A  | 176.9(2) |
| Ru1-N3A     | 2.046(4) | N2-Ru1-N3   | 90.3(2)  |
| N1-Ru1-N1A  | 87.2(2)  | N2A-Ru1-N3  | 92.1(2)  |
| N1-Ru1-N2   | 80.1(2)  | N2-Ru1-N3A  | 92.1(2)  |
| N1A-Ru1-N2  | 97.6(2)  | N2A-Ru1-N3A | 90.3(2)  |
| N1-Ru1-N2A  | 97.6(2)  | N3-Ru1-N3A  | 79.1(2)  |
| N1A-Ru1-N2A | 80.1(2)  |             |          |

**Extended hydrogen bonded structure.** The phosphonate groups of **H<sub>2</sub>2** lead to formation of hydrogen bonded chains of **H<sub>2</sub>2** molecules propagating in the crystallographic *bc* plane. Further hydrogen bonds between the crown ether groups and included water molecules connect the chains into a 3D network.

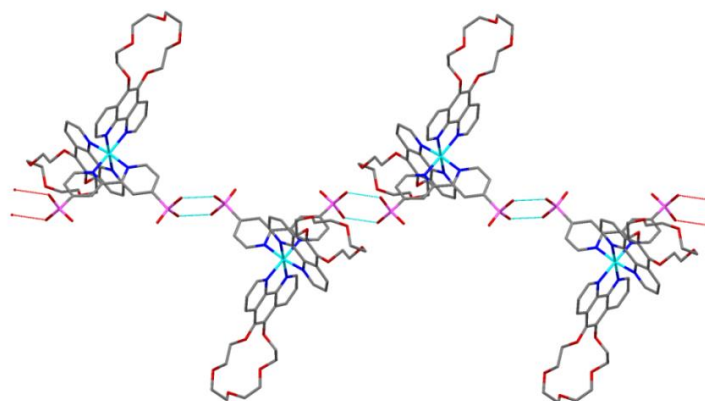

**Figure S1** Hydrogen bonding between phosphonate groups in a chain of **H<sub>2</sub>2** molecules. C atoms are grey; N, blue; O, red; P, magenta; Ru, light blue; H-bonds to solvent water molecules are omitted for clarity.

### 3. UV-vis spectra and Cyclic Voltammograms of [Et<sub>4</sub>2][PF<sub>6</sub>]<sub>2</sub> in the presence and absence of cations

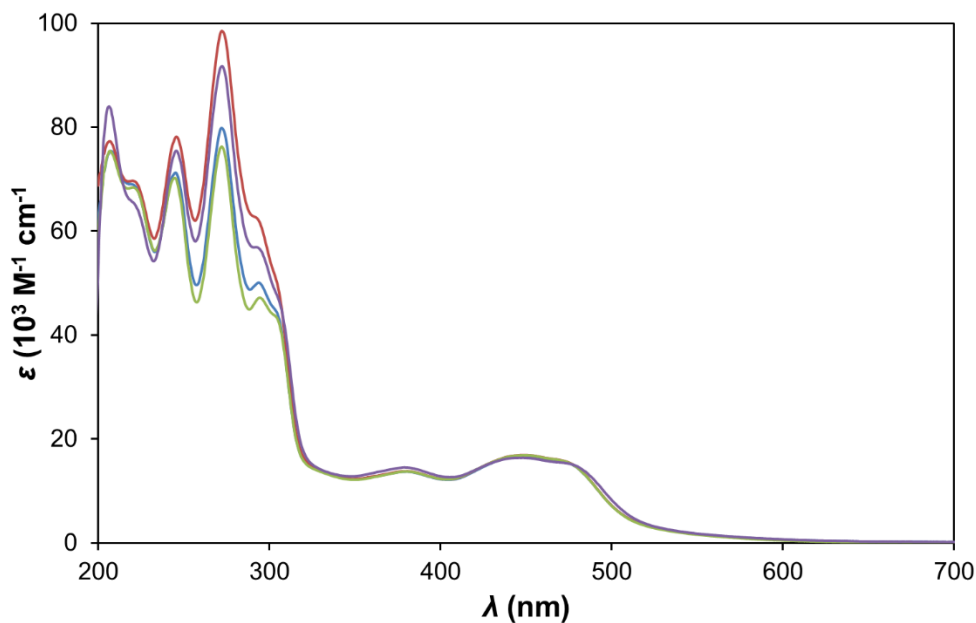

**Figure S2** Effect of alkali metal cations and ionic strength (NBu<sub>4</sub><sup>+</sup>) on the UV-vis spectrum of [Et<sub>4</sub>2][PF<sub>6</sub>]<sub>2</sub>. Blue, no cation added; red, [NBu<sub>4</sub>][PF<sub>6</sub>]; green, NaClO<sub>4</sub>; purple, Mg(ClO<sub>4</sub>)<sub>2</sub>. In all cases 500 equivalents of salt was added to ca. 2 × 10<sup>-5</sup> M [Et<sub>4</sub>2][PF<sub>6</sub>]<sub>2</sub> in MeCN at 298 K.

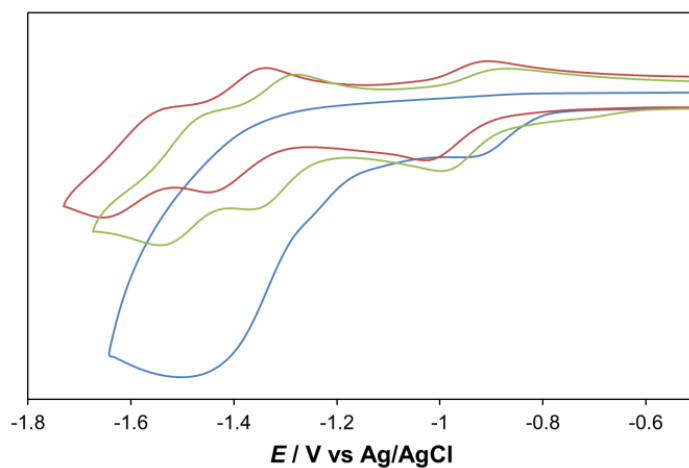

**Figure S3** Effect of alkali metal cations on the ligand centered reductions of [Et<sub>4</sub>2]<sup>2+</sup> in 0.1 M NBu<sub>4</sub>PF<sub>6</sub>, scan rate 125 mV s<sup>-1</sup>. Red, no cation; green, Na<sup>+</sup>; blue, Mg<sup>2+</sup>. The first reduction is still reversible in the presence of Mg<sup>2+</sup> if the scan direction is changed before the second two processes occur.

#### 4. Typical UV-vis Spectra of Films: Summary of Dye and Catalyst Loadings

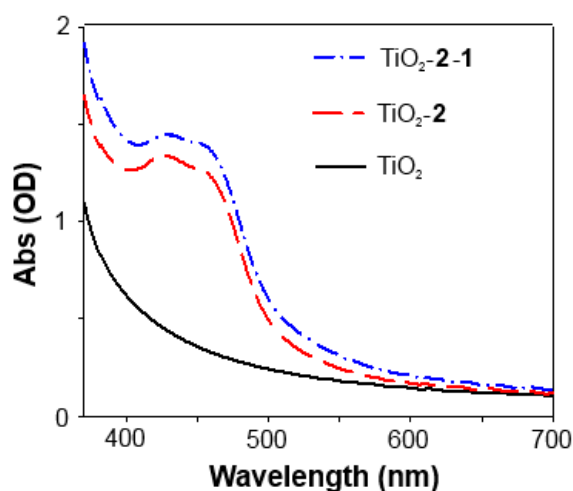

**Figure S4** UV-vis absorption spectra of TiO<sub>2</sub> (black), TiO<sub>2</sub>-2 (red) and TiO<sub>2</sub>-2-1 (blue).

Differences between the absorption spectra of TiO<sub>2</sub>, TiO<sub>2</sub>-**dye** and TiO<sub>2</sub>-**dye-1** (Figure S4, for TiO<sub>2</sub>-2) were used to estimate loadings of the two species based on their extinction coefficients at 455 nm (11700 for **P2**, 19100 for **2** and 32000 for **1** on the TiO<sub>2</sub> surface). The results for films used in photoelectrochemical experiments are summarized below in Table S3:

**Table S2** Loadings (nmol cm<sup>-2</sup>) of dye and catalyst in assembled water oxidation triads. Loadings are based on flat surface areas, and do not take into account surface roughness.

| TiO <sub>2</sub> -P2-1 films |          | TiO <sub>2</sub> -2Na <sub>2</sub> -1 films |          |
|------------------------------|----------|---------------------------------------------|----------|
| Dye                          | Catalyst | Dye                                         | Catalyst |
| 87                           | 10       | 65                                          | 12       |
| 89                           | 13       | 80                                          | 11       |
| 101                          | 19       | 82                                          | 14       |
| 33 <sup>a</sup>              | 13       | 57                                          | 13       |
| 60 <sup>a</sup>              | 12       | 42 <sup>a</sup>                             | 10       |
| 53 <sup>a</sup>              | 10       | 27 <sup>a</sup>                             | 13       |
|                              |          | 49 <sup>a</sup>                             | 10       |

<sup>a</sup>Dye loading lowered by previous use in photoelectrochemical experiment as a TiO<sub>2</sub>-**dye** dyad.

#### 14. Ultrafast Visible TAS – Variation of Catalyst Loading and pH

Both catalyst loading and pH influence the rate of the bleach recovery of **2**.

**Table S3** Summary of dye (**2**)-to-catalyst (**1**) ratios obtained for catalyst loading dependence experiments.

| Experiment | Supporting dyad                           | Dye ( <b>2</b> ) : Catalyst ( <b>1</b> ) ratio in triad |
|------------|-------------------------------------------|---------------------------------------------------------|
| A          | TiO <sub>2</sub> - <b>2</b>               | 180 : 100                                               |
| B          | TiO <sub>2</sub> - <b>2</b>               | 90 : 100                                                |
| C          | TiO <sub>2</sub> - <b>2Na<sub>2</sub></b> | 60 : 100                                                |
| D          | TiO <sub>2</sub> - <b>2Na<sub>2</sub></b> | 40 : 100                                                |

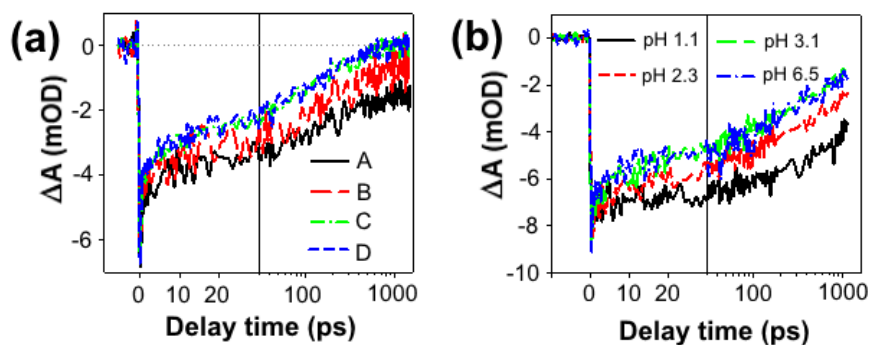

**Figure S5** (a) Ground state bleach recovery of **2** in the presence of different loadings of **1** on  $\text{TiO}_2$  (**A** – lowest loading, **D** – highest loading, see Table S4); (b) Comparison of the ground state recovery kinetics of  $\text{TiO}_2$ -**2-1** films after rinsing with different pH solutions of  $\text{HClO}_4$ .

## 6. Photoelectrochemical Control Experiments

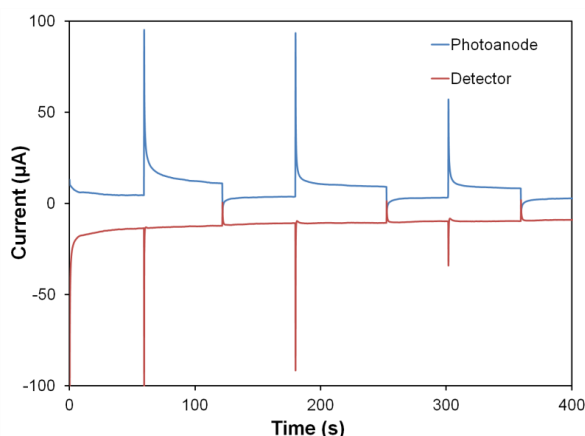

**Figure S6** Photoelectrochemical generator/detector experiment conducted in acetonitrile (0.1 M in  $\text{NBu}_4\text{PF}_6$ ) with a  $\text{TiO}_2$ -**P2-1** photoelectrode (at 0 V) and a plain FTO glass slide as a detector (at -0.75 V vs Ag/AgCl). Illumination (20 mW) is from a 455 nm LED. The detector response, apart from the initial spike in response to electron injection, is very small, indicating that the reduction current depends on the presence of water.

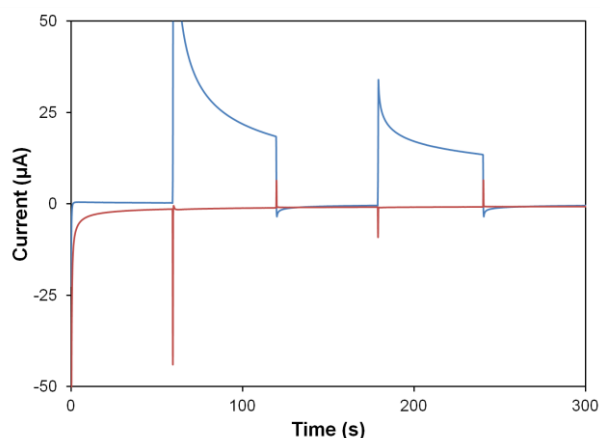

**Figure S7** Photoelectrochemical generator/detector experiment at pH 7.2 with a  $\text{TiO}_2$ -**2Na2-1** photoelectrode (at 0 V) and a plain FTO glass slide as a detector (-0.6 V vs Ag/AgCl). Illumination (20 mW) is from a 455 nm LED. In contrast to the platinised FTO detector films, the response is very small ( $< 0.1 \mu\text{A}$ ) after the initial spike that results from the charging current response to electron injection at the photoanode. This shows that the pseudo-steady state photocurrent must result from reduction of a chemical species, catalysed by Pt.

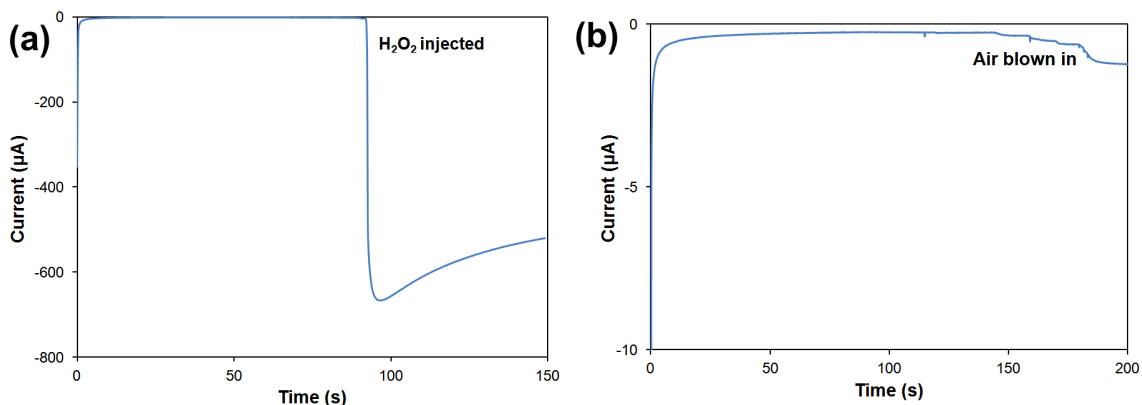

**Figure S8** Control chronoamperometry experiments on an FTO slide at  $-0.6$  V vs Ag/AgCl, in degassed lutidine buffer at pH 7.2: (a) One drop of  $\text{H}_2\text{O}_2$  injected after *ca.* 90 s produces a very large current response (*ca.* 700  $\mu\text{A}$ ); (b) Air blown in in several bursts after 120 s produces a slow, and weak response ( $< 1$   $\mu\text{A}$ , note difference in scales between the two graphs). The total amount of oxygen blown in far exceeds that produced by the photoanodes. The strong response to  $\text{H}_2\text{O}_2$ , and weak response to  $\text{O}_2$ , suggests that the species generated by the photoelectrochemistry experiments cannot be  $\text{H}_2\text{O}_2$  (or other easily reduced species such as hydroxyl radicals), but is likely to be  $\text{O}_2$ .

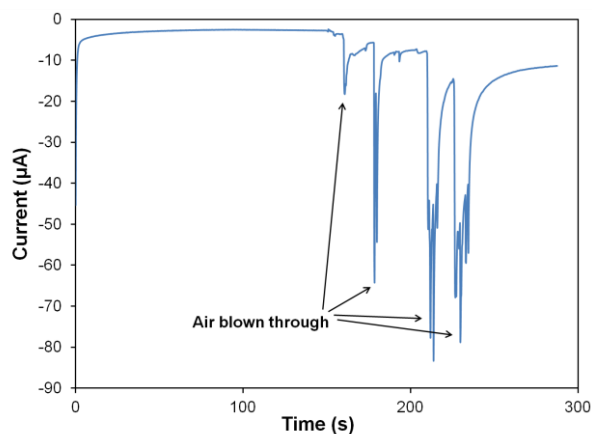

**Figure S9** Chronoamperometry of a Pt@FTO film held at  $-0.6$  V vs Ag/AgCl, in pH 7.2 lutidine buffer. Bubbling air through the buffer solution produces a very strong detector response.

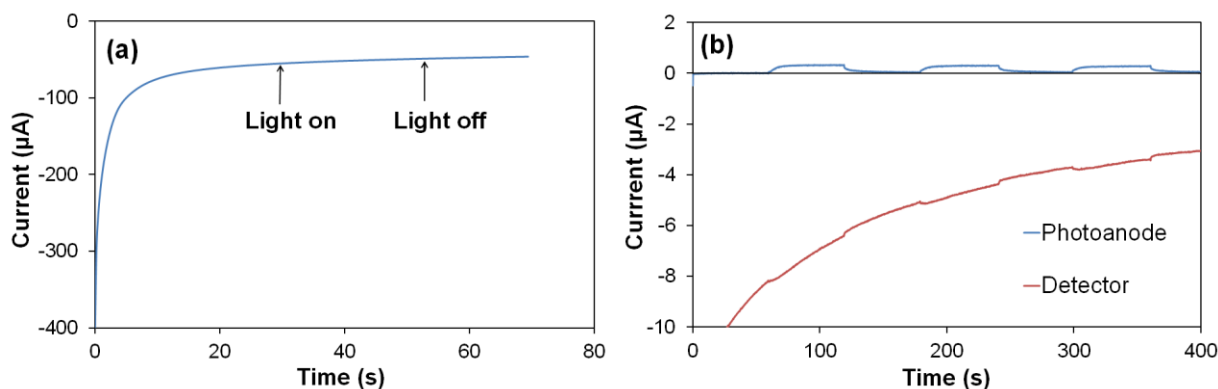

**Figure S10** (a) Chronoamperometry of a Pt@FTO film held at  $-0.516$  V vs Ag/AgCl, in pH 5.8  $\text{Na}_2\text{SiF}_6/\text{NaHCO}_3$  buffer, in the presence of  $[\text{Ru}(\text{phen})_3]^{2+}$ . Irradiation of the solution (20 mW, 455 nm) produces no photocurrent response, indicating that reduction of desorbed dye cannot be a source of the detector currents. (b) Photoelectrochemical generator/detector experiment on a bare  $\text{TiO}_2$  film, at pH 5.8, with photoanode at 0 V and Pt@FTO detector at  $-0.516$  V vs Ag/AgCl. It can be seen that direct bandgap excitation of  $\text{TiO}_2$  produces only a very small response (*ca.* 0.3  $\mu\text{A}$ , an order of magnitude lower than even the P2 dyad electrodes).

## 7. Extended Photoelectrochemical Experiments

These were carried out to investigate the performance of the triadic photoelectrodes over several hours. Noise in the measurements carried out on the **P2** based systems has been minimized using a moving average to smooth the chronoamperometry (current vs time) plots (Figure S11b). No treatment has been used in the integrated (charge vs time plots), Figure S12.

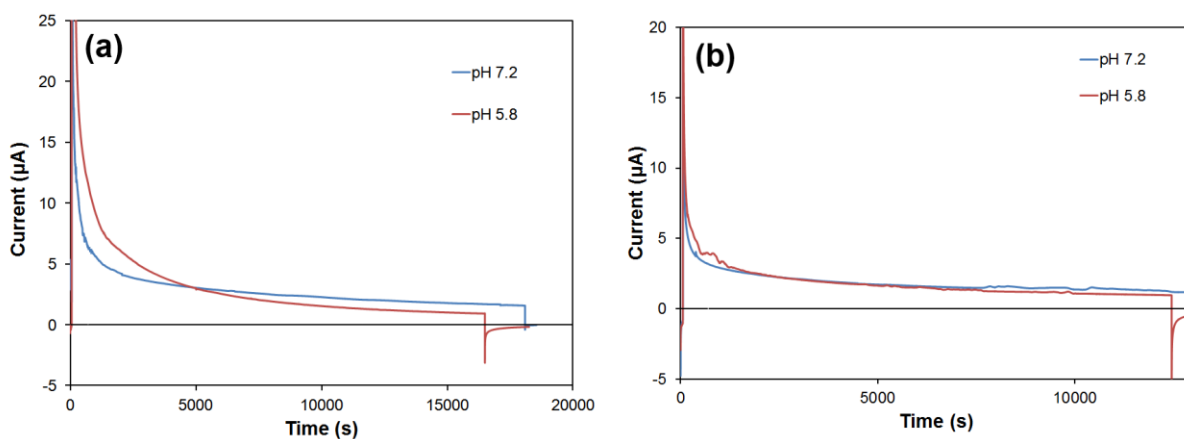

**Figure S11** Photoelectrochemical (chronoamperometry) experiments at 0 mV vs Ag/AgCl with illumination from a 455 nm blue LED (20 mW into 0.6 cm<sup>2</sup>): (a) TiO<sub>2</sub>-2Na<sub>2</sub>-1 in pH 7.2 50 mM lutidine with 200 mM NaClO<sub>4</sub> (blue), and pH 5.8 Na<sub>2</sub>SiF<sub>6</sub>/NaHCO<sub>3</sub> (200 mM in Na, red); (b) TiO<sub>2</sub>-P2-1 at pH 7.2 (blue) and pH 5.8 (red). For both systems the initial photocurrent is higher at pH 5.8, but long term stability appears better in the pH 7.2 buffer.

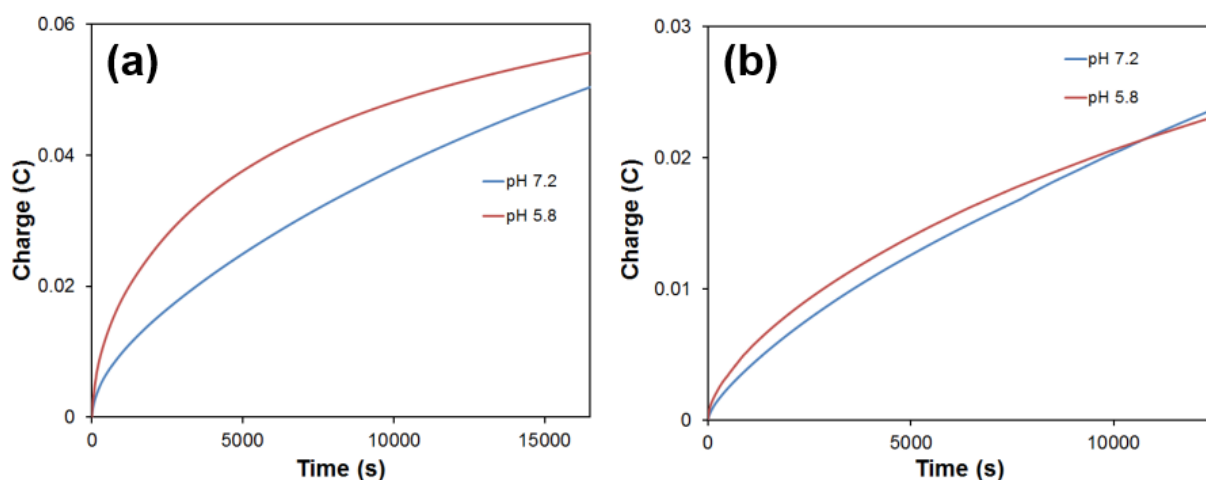

**Figure S12** Bulk electrolysis (charge vs time) plots from photoelectrochemical experiments at 0 mV vs Ag/AgCl with illumination from a 455 nm blue LED (20 mW into 0.6 cm<sup>2</sup>): (a) TiO<sub>2</sub>-2Na<sub>2</sub>-1 in pH 7.2 50 mM lutidine with 200 mM NaClO<sub>4</sub> (blue), and pH 5.8 Na<sub>2</sub>SiF<sub>6</sub>/NaHCO<sub>3</sub> (200 mM in Na, red); (b) TiO<sub>2</sub>-P2-1 at pH 7.2 (blue) and pH 5.8 (red). It is clear that the early time advantage at pH 5.8 is much smaller with the **P2** sensitizer, and after about 3 hours, charge passed at pH 7.2 exceeds that at pH 5.8.



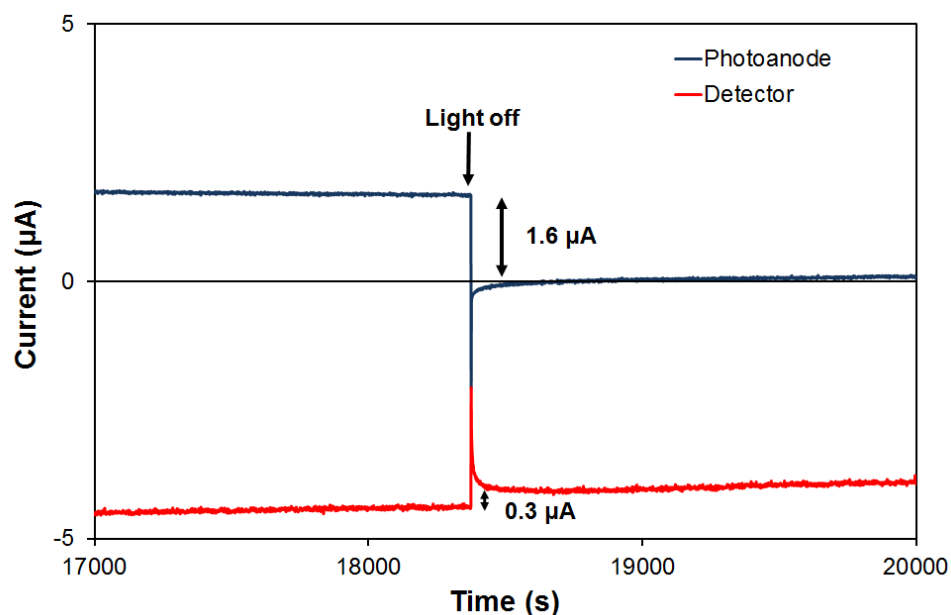

**Figure S13** End of a long photoelectrochemical experiment with a Pt@FTO detector in place, with a  $\text{TiO}_2\text{-2Na}_2\text{-1}$  photoanode. The *ca.*  $0.3 \mu\text{A}$  fall in detector current that accompanies the fall in photoanode current indicates that the photoanode is still producing  $\text{O}_2$  after 5 hours. As the performance of the platinized films declines quite quickly with use, however, it is not possible to estimate a faradaic efficiency at the end of the experiment. Conditions: pH 7.2 50 mM lutidine (200 mM  $\text{NaClO}_4$ ) 0 mV bias *vs* Ag/AgCl applied to the photoanode, -0.6 V *vs* Ag/AgCl to the detector, with illumination from a 455 nm blue LED (20 mW into  $0.6 \text{ cm}^2$ ).

## 8. Transient Visible Spectroscopy of $\text{H}_2\text{2}$ in Aqueous Solution

The transient absorption spectra and kinetics of  $\text{H}_2\text{2}$  in aqueous solution are shown in Figure S14. The dye has an excited state with a half-life of 685 ns in water (298 K, in the presence of  $\text{O}_2$ ).

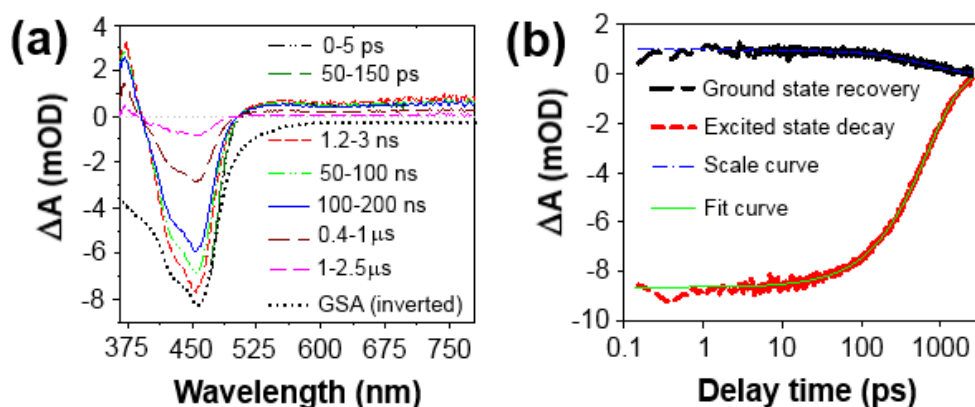

**Figure S14** (a) Transient absorption spectra of  $\text{H}_2\text{2}$  in aqueous solution at indicated delay times after excitation at 400 nm. GSA is the ground-state absorption of  $\text{H}_2\text{2}$  in aqueous solution. (b) Kinetics of excited state decay and ground state recovery: **Red** - ground state bleach averaged over 410-480 nm; **Black** - excited state signal averaged over 570-760nm.

## 9. UV-vis Spectra of Dyes and Catalyst 1 at High and Low pH

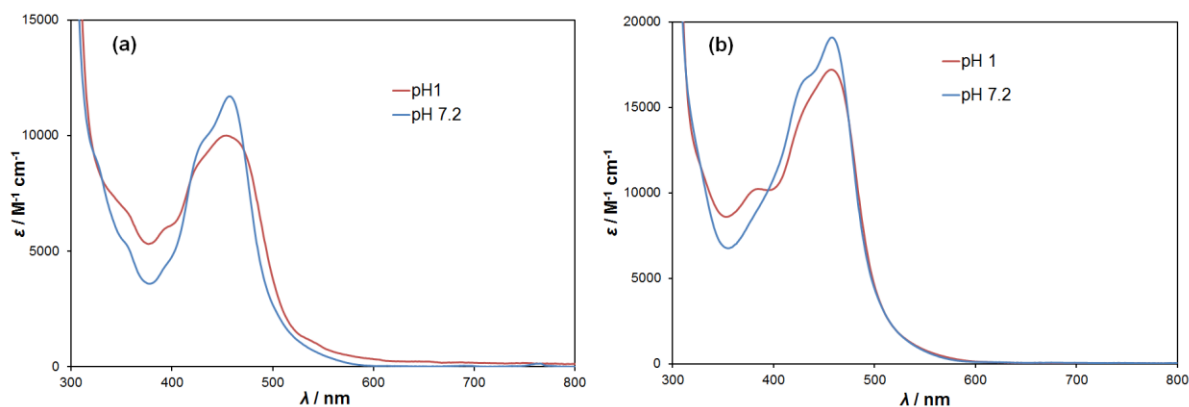

**Figure S15** UV-vis spectra of the two sensitizers in a 50 mM lutidine buffer at pH 7.2 and after acidification to pH 1 by addition of  $\text{H}_2\text{SO}_4$ : (a) P2 and; (b) H22.

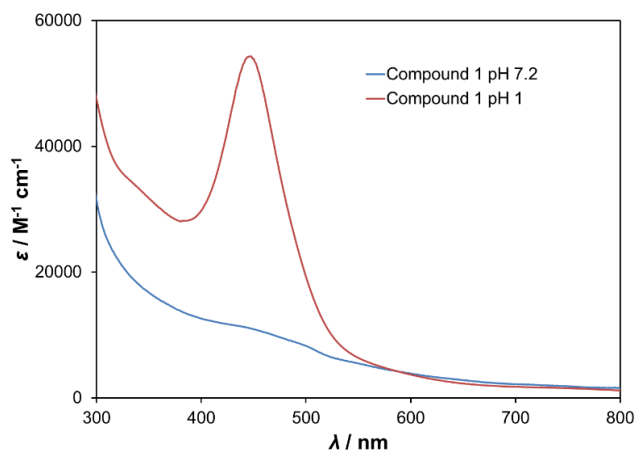

**Figure S16** UV-vis spectra of 1 in 50 mM pH 7.2 lutidine (blue) buffer in pH 1  $\text{H}_2\text{SO}_4$  (red), showing the dramatic change in extinction coefficient with pH.

## 10. UV-vis Spectra of Buffers from Desorption Experiments: Calculation of lost dye and catalyst

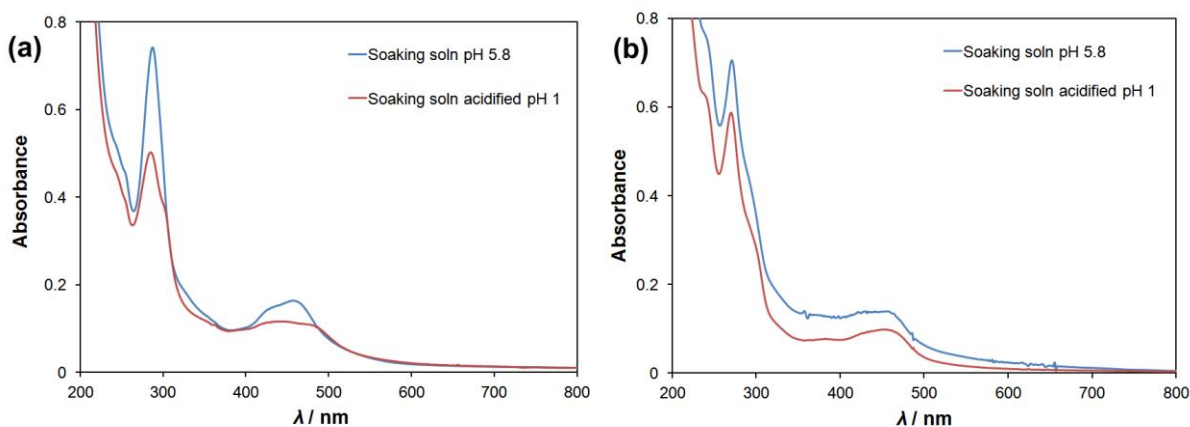

**Figure S17** UV-vis spectra (after 60 minutes) of pH 5.8  $\text{Na}_2\text{SiF}_6/\text{NaHCO}_3$  buffers used to soak: (a)  $\text{TiO}_2$ -P2-1 and; (b)  $\text{TiO}_2$ -2-1 photoelectrodes. After measurement at the buffer pH, the solutions were acidified to pH 1 by addition of 1 drop of 98%  $\text{H}_2\text{SO}_4$ . In both examples 3 mL of buffer was used.

Figure S17 shows the spectra of solutions from desorption experiments conducted on TiO<sub>2</sub>-**P2-1** and TiO<sub>2</sub>-**2-Na2-1** photoanodes in pH 5.8 buffer (Na<sub>2</sub>SiF<sub>6</sub>/NaHCO<sub>3</sub>). In both cases, the drop in absorbance from pH 5.8 to pH 1 exceeds what would be predicted based on pH driven changes of extinction coefficient for the dye (*ca.* 15% for **P2** and 10% for **2**, Figure S17). This indicates that none of the catalyst **1** can be lost at this pH (the extinction coefficient of **1** increases dramatically upon acidification and would counterbalance the reduced absorbance from the dyes).

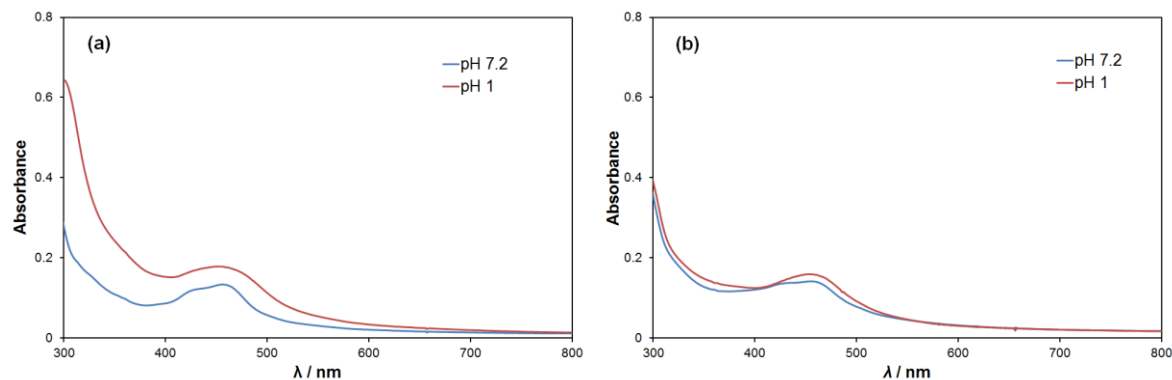

**Figure S18** UV-vis spectra (after 60 minutes) of pH 7.2 lutidine buffers used to soak: (a) TiO<sub>2</sub>-**P2-1** and; (b) TiO<sub>2</sub>-**2-1** photoelectrodes. After measurement at the buffer pH, the solutions were acidified to pH 1 by addition of 1 drop of 98% H<sub>2</sub>SO<sub>4</sub>. In both examples 3 mL of buffer was used.

Figure S18 shows the spectra of solutions from desorption experiments conducted on TiO<sub>2</sub>-**P2-1** and TiO<sub>2</sub>-**2Na2-1** photoanodes in pH 7.2 lutidine buffer. In both cases, an increase in absorbance is observed upon acidification from pH 7.2 to pH 1 – and the increase is larger for the **P2** based photoelectrodes. As it is known that the extinction coefficient of **1** increases dramatically at low pH (Fig. S16), this indicates that **1** is lost from both photoelectrodes, but that the losses are less severe with the crown derivatized dye **2**. To get the quantitative data presented in Table 6 of the paper, we followed the iteration procedure below, demonstrated for TiO<sub>2</sub>-**P2-1**:

**P2:**  $\epsilon_{455} = 11700$  at pH 7.2;  $10000$  at pH 1,  $\Delta\epsilon_{455} = 1700$

**1:**  $\epsilon_{455} = 10700$  at pH 7.2,  $52000$  at pH 1,  $\Delta\epsilon_{455} = 41300$

At pH 7.2,  $Abs_{455} = 0.133$

At pH 1,  $Abs_{455} = 0.178$

$\Delta Abs_{455} = 0.045$

To make initial estimate of concentration of **1**, assume extinction coefficient of dye is constant and divide  $\Delta Abs_{455}$  by  $\Delta\epsilon_{455}\{\mathbf{1}\}$ . The path length of the cuvette is 1 cm so:

$$0.045 / (41300 \text{ M}^{-1} \text{ cm}^{-1} \times 1 \text{ cm}) = 1.09 \times 10^{-6} \text{ M}$$

At pH 7.2, this will contribute an absorbance of  $1.09 \times 10^{-6} \text{ M} \times 10700 \text{ M}^{-1} \text{ cm}^{-1} \times 1 \text{ cm} = 0.0117$

The remaining  $Abs_{455}$ :  $0.133 - 0.0117 = 0.1213$  results only from the dye **P2**. This will decrease upon acidification:

$$0.1213 \times (10000/11700) = 0.1037 \text{ at pH 1}$$

Refined catalyst contribution to pH 1  $Abs_{455} = 0.178 - 0.1037 = 0.0743$

$$\text{Refined catalyst concentration} = 0.0743 / (52000 \text{ M}^{-1} \text{ cm}^{-1} \times 1 \text{ cm}) = 1.429 \times 10^{-6} \text{ M}$$

This procedure is repeated a second time, inserting the calculated concentration of catalyst at pH 1 back in at pH 7.2, to get a refined estimate of the quantity of dye and catalyst lost from the photoelectrode.

## 11. Evolution of Photoelectrode Absorbance Loss with Time

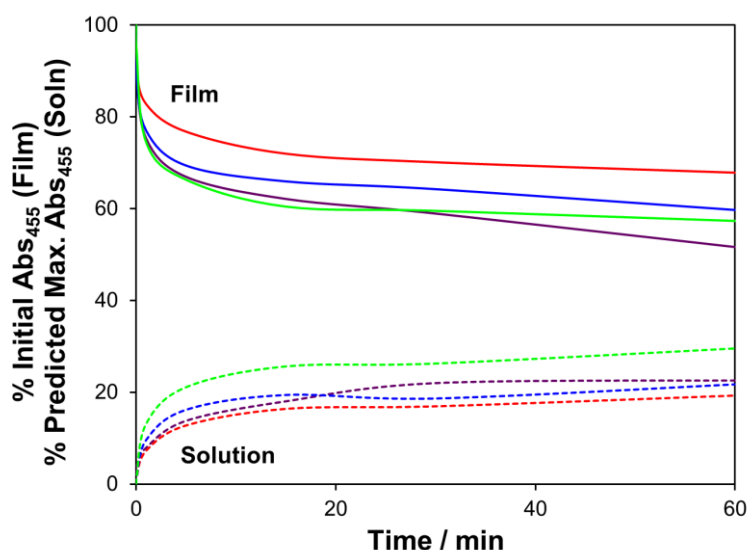

**Figure S19** Desorption of TiO<sub>2</sub>-**2-1** and TiO<sub>2</sub>-**P2-1** films into 50 mM lutidine / 200 mM NaClO<sub>4</sub> pH 7.2 buffer. Solid lines show the absorbance of each film over time as a percentage of the initial value (TiO<sub>2</sub> background subtracted). Dashed lines show the absorbance of the solution over time, as a percentage of the predicted maximum based on the initial film absorbance. Purple, **P2**; red, **2**; blue, **2-Na<sub>2</sub>**; green, **2-Mg<sub>2</sub>**.

## 12. Experimental Details

### 12.1 Synthesis

**Materials and Procedures.** All synthetic manipulations in the synthesis of H<sub>2</sub>**2** were carried out under an inert atmosphere (Argon) using standard Schlenk techniques. Polyoxometalate chemistry (TBA<sub>7</sub>H<sub>3</sub>[**1**]) was carried out under air. TiO<sub>2</sub> colloids were prepared according to a modified literature method.<sup>1</sup> Rb<sub>8</sub>K<sub>2</sub>[{Ru<sub>4</sub>O<sub>4</sub>(OH)<sub>2</sub>(H<sub>2</sub>O)<sub>4</sub>}γ-SiW<sub>10</sub>O<sub>36</sub>]<sub>2</sub>•25H<sub>2</sub>O (Rb<sub>8</sub>K<sub>2</sub>[**1**])<sup>2</sup> and THpA<sub>8.5</sub>H<sub>1.5</sub>[{Ru<sub>4</sub>O<sub>4</sub>(OH)<sub>2</sub>(H<sub>2</sub>O)<sub>4</sub>}(γ-SiW<sub>10</sub>O<sub>36</sub>)<sub>2</sub>] (THpA<sub>8.5</sub>H<sub>1.5</sub>[**1**]),<sup>3</sup> 5-crown-phen,<sup>4</sup> 2,2'-bipyridine-4,4'-diphosphonic acid ethyl ester (Et<sub>4</sub>dpbpy),<sup>5</sup> [Ru(bpy)<sub>2</sub>(dpbpy)]Cl<sub>2</sub> (**P2**)<sup>6</sup> and Ru(DMSO)<sub>4</sub>Cl<sub>2</sub><sup>7</sup> were all prepared using established methods. Platinized FTO films were obtained by heat treatment of H<sub>4</sub>[PtCl<sub>6</sub>] deposited on FTO from <sup>1</sup>PrOH, following a literature procedure.<sup>8</sup> Several treatments were needed to produce highly responsive films. Anhydrous DMF was purchased from EMD in *Drisolv*® bottles. All other chemicals were bought as ACS reagent grade from commercial sources and used as received.

**Structural Characterization.** NMR spectra were acquired using Varian INOVA 400 and Bruker Avance 300 spectrometers and all shifts are quoted with respect to TMS. The fine splitting of pyridyl or phenyl ring AA'BB' patterns is ignored and the signals are reported as simple doublets. Mass spectra were acquired using a Thermo LTQ-FTMS at the Emory University Mass Spectrometry Center, or outsourced to the UK EPSRC National Mass Spectrometry Facility in Swansea, UK. FTIR spectra were acquired using Nicolet FTIR 6700 and PerkinElmer Spectrum Two instruments. Elemental analyses (CHN) were performed by Atlantic MicroLab, Inc and by London Metropolitan University. X-ray diffraction data (see below) were obtained using a Bruker Apex II CCD diffractometer (Cu K<sub>α</sub>, λ = 1.54178 Å).

**Synthesis of [(Et<sub>4</sub>dpbpy)Ru(5-crown-phen)<sub>2</sub>](PF<sub>6</sub>)<sub>2</sub> ([Et<sub>4</sub>2][PF<sub>6</sub>]<sub>2</sub>).** 5-crown-phen (68 mg, 0.183 mmol) was added to a mixture of Ru(DMSO)<sub>4</sub>Cl<sub>2</sub> (50 mg, 0.103 mmol) and tetramethylammonium chloride (250 mg, 0.428 mmol) in dry DMF (5 mL). After stirring at 130 °C for 4 hours, the mixture was cooled and added to DCM (80 mL) and precipitated tetramethylammonium chloride was removed by filtration. The filtrate was washed with 3 × 40 mL portions of water before drying over MgSO<sub>4</sub> and evaporation to yield a crude purple solid (84 mg) which was shown by <sup>1</sup>H-NMR to contain an approximately 2:1 mixture of [Ru(5-crown-phen)<sub>2</sub>Cl<sub>2</sub>] and [Ru(5-crown-phen)Cl<sub>2</sub>(solv)<sub>2</sub>] products. Without further purification, this was combined with Et<sub>4</sub>dpbpy (66 mg, 0.154 mmol) in EtOH 9:1 H<sub>2</sub>O (20 mL), and refluxed for 18 hours taking on a deep orange colour. After evaporation of the ethanol *in vacuo*, 10% aqueous NH<sub>4</sub>PF<sub>6</sub> (*ca.* 5 mL) was added to the aqueous solution and the resulting orange suspension was washed with 10 mL portions of DCM until the organic layer no longer took on an orange colour. The combined organic layers were dried *in vacuo* yielding an orange solid (107 mg) containing a mixture of part-hydrolysed [Et<sub>4</sub>2]<sup>2+</sup> and [(Et<sub>4</sub>dpbpy)<sub>2</sub>Ru(5-crown-phen)]<sup>2+</sup> derivatives. These were re-esterified by refluxing for 5 hours in triethylorthoacetate (3 mL), with sufficient anhydrous acetonitrile added to allow complete dissolution of the starting material. The crude product was precipitated with diethyl ether and columned over silica (eluent 80:8:1 then 40:8:1 acetone/H<sub>2</sub>O/satd. KNO<sub>3</sub>). Acetone was removed *in vacuo* from the second orange band, containing [Et<sub>4</sub>2]<sup>2+</sup>, and addition of aqueous NH<sub>4</sub>PF<sub>6</sub> afforded a precipitate which was filtered off, washed with water and dried. Reprecipitation from acetone/diethyl ether in the presence of 18-crown-6 gave an orange solid: 32 mg, 0.021 mmol, 23%; δ<sub>H</sub> (300 MHz, (CD<sub>3</sub>)<sub>2</sub>CO) 9.15 (2 H, d, *J* = 13.2 Hz, C<sub>5</sub>H<sub>3</sub>PN), 8.91 (2 H, d, *J* = 8.5 Hz, C<sub>5</sub>H<sub>3</sub>N), 8.82 (2 H, d, *J* = 8.5 Hz, C<sub>5</sub>H<sub>3</sub>N), 8.46 (2 H, d, *J* = 5.1 Hz, C<sub>5</sub>H<sub>3</sub>N), 8.21 (2 H, dd, *J* = 5.7 Hz, 4.0 Hz, C<sub>5</sub>H<sub>3</sub>PN), 8.12 (2 H, d, *J* = 5.3 Hz, C<sub>5</sub>H<sub>3</sub>N), 7.89 (2 H, dd, *J* = 8.5 Hz, 5.3 Hz, C<sub>5</sub>H<sub>3</sub>N), 7.72 (2 H, dd, *J* = 8.3 Hz, 5.1 Hz, C<sub>5</sub>H<sub>3</sub>N), 7.63 (2 H, dd, *J* = 12.5 Hz, 5.7 Hz), 4.66–4.48 (8 H, m, CH<sub>2</sub>), 4.28–3.98 (16 H, m, CH<sub>2</sub>), 3.80 – 3.62 (16 H, m, CH<sub>2</sub>), 1.29 (12 H, *pq*, *J* = 7.4 Hz, CH<sub>3</sub>). ESI<sup>+</sup>-MS: *m/z* 1415.3 [Et<sub>4</sub>2+PF<sub>6</sub>]<sup>+</sup>, 635.17 [Et<sub>4</sub>2]<sup>2+</sup>. FTIR (diamond anvil) cm<sup>-1</sup>: 2911 w, 2856 w, 1733 vw, 1623 m, 1599 vw, 1583 vw, 1513 vw, 1464 m, 1428 m, 1397 m, 1342 m, 1321 m, 1256 m, 1123 s, 1077 s, 1048 s, 1015 s, 975 m, 832 vs, 727 m, 556 vs. Elemental analysis for C<sub>58</sub>H<sub>70</sub>F<sub>12</sub>N<sub>6</sub>O<sub>16</sub>P<sub>4</sub>Ru ([Et<sub>4</sub>2][PF<sub>6</sub>]<sub>2</sub>) calcd (found) %: C 44.65 (44.56), H 4.52 (4.58), N 5.39 (5.26). Note: a significant quantity of the mono-crown product [Et<sub>8</sub>3](PF<sub>6</sub>)<sub>2</sub> was isolated from the first orange band: 12 mg, 0.0074 mmol, 10%; δ<sub>H</sub> (300 MHz, (CD<sub>3</sub>)<sub>2</sub>CO) 9.14 (2 H, d, 13.4 Hz, C<sub>5</sub>H<sub>3</sub>PN), 9.12 (2 H, d, *J* = 13.4 Hz, C<sub>5</sub>H<sub>3</sub>PN), 8.90 (2 H, d, *J* = 8.5 Hz, C<sub>5</sub>H<sub>3</sub>N), 8.41–8.36 (2 H, m, C<sub>5</sub>H<sub>3</sub>PN), 8.34 (2 H, d, *J* = 5.3 Hz, C<sub>5</sub>H<sub>3</sub>N), 8.08–8.04 (2 H, m, C<sub>5</sub>H<sub>3</sub>PN), 7.86 (2 H, dd, *J* = 8.5 Hz, 5.3 Hz, C<sub>5</sub>H<sub>3</sub>N), 7.76 (2 H, dd, *J* = 12.5 Hz, 5.7 Hz, C<sub>5</sub>H<sub>3</sub>PN), 7.60 (2 H, dd, *J* = 12.5 Hz, 5.7 Hz, C<sub>5</sub>H<sub>3</sub>PN), 4.63–4.52 (4 H, m, CH<sub>2</sub>), 4.27–4.08 (16 H, m, CH<sub>2</sub>), 4.07–4.03 (4 H, m, CH<sub>2</sub>), 3.78–3.67 (8 H, m, CH<sub>2</sub>), 1.36–1.24 (24 H, m, CH<sub>3</sub>). ESI<sup>+</sup>-MS: *m/z* 1473.28 [M+PF<sub>6</sub>]<sup>+</sup>, 664.15 [M]<sup>2+</sup>. FTIR (diamond anvil) cm<sup>-1</sup>: 2984 w, 2910 w, 1733 vw, 1623 m, 1599 vw, 1583 vw, 1513 vw, 1464 m, 1429 m, 1397 m, 1342 w, 1322 w, 1252 m, 1125 m, 1078 m, 1048 s, 1014 s, 978 m, 832 vs, 727 m, 556 vs. Elemental analysis for C<sub>56</sub>H<sub>74</sub>F<sub>12</sub>N<sub>6</sub>O<sub>17</sub>P<sub>6</sub>Ru, calcd (found) %: C 41.57 (41.44), H 4.61 (4.51), N 5.19 (5.15).

**Synthesis of [(H<sub>2</sub>dpb)Ru(5-crown-phen)<sub>2</sub>] ([H<sub>2</sub>2]).** [Et<sub>4</sub>2][PF<sub>6</sub>]<sub>2</sub> (85 mg, 0.055 mmol) was suspended in 4.0 M aqueous HCl and refluxed for 4 hours before evaporation to dryness *in vacuo*. The resulting red solid was chromatographed on Sephadex LH20 resin, with H<sub>2</sub>O as eluent. The collected orange fractions were reduced in volume *in vacuo* and precipitation by addition of acetone yielded red, solid [H<sub>2</sub>2]•11H<sub>2</sub>O: 41 mg, 0.031 mmol, 56%; δ<sub>H</sub> (400 MHz,

D<sub>2</sub>O) 8.78–8.69 (4 H, m, C<sub>5</sub>H<sub>3</sub>PN + C<sub>5</sub>H<sub>3</sub>N), 8.64 (2 H, d, *J* = 8.2 Hz, C<sub>5</sub>H<sub>3</sub>N), 8.15 (2 H, d, *J* = 5.2 Hz, C<sub>5</sub>H<sub>3</sub>N), 7.84 (2 H, d, *J* = 5.2 Hz, C<sub>5</sub>H<sub>3</sub>N), 7.78 (2 H, dd, *J* = 5.5 Hz, 3.6 Hz, C<sub>5</sub>H<sub>3</sub>PN), 7.71 (2 H, dd, *J* = 8.5 Hz, 5.2 Hz, C<sub>5</sub>H<sub>3</sub>N), 7.51 (2 H, dd, *J* = 8.2 Hz, 5.2 Hz, C<sub>5</sub>H<sub>3</sub>N), 7.42 (2 H, dd, *J* = 11.6 Hz, 6.1 Hz, C<sub>5</sub>H<sub>3</sub>PN), 4.49–4.42 (8 H, m, CH<sub>2</sub>), 4.09 – 4.02 (8 H, m, CH<sub>2</sub>), 3.83–3.74 (16 H, m, CH<sub>2</sub>). ESI<sup>+</sup>-MS: *m/z* 1179.2 ([H<sub>2</sub>2-Na]<sup>+</sup>), 1168.2 ([H<sub>2</sub>2]<sub>2</sub>HNa]<sup>2+</sup>), 1157.2 ([H<sub>3</sub>2]<sup>+</sup>). FTIR (diamond anvil) cm<sup>-1</sup>: 3375 s, 3240 s, 3081 m, 2866 m, 1643 w, 1620 m, 1597 w, 1580 w, 1461 m, 1426 m, 1397 m, 1339 m, 1317 m, 1266 w, 1238 m, 1176 w, 1119 s, 1075 s, 1049 s, 973 w, 908 m, 811 m, 719 m. Elemental analysis for C<sub>50</sub>H<sub>78</sub>N<sub>6</sub>O<sub>27</sub>P<sub>2</sub>Ru ([H<sub>2</sub>2]•11H<sub>2</sub>O) calcd (found) %: C 44.35 (44.20), H 5.51 (5.42), N 6.21 (6.21).

**Synthesis of [NBu<sub>4</sub>]<sub>7</sub>H<sub>3</sub>[{Ru<sub>4</sub>O<sub>4</sub>(OH)<sub>2</sub>(H<sub>2</sub>O)<sub>4</sub>}<sub>γ</sub>-SiW<sub>10</sub>O<sub>36</sub>]<sub>2</sub> (TBA<sub>7</sub>H<sub>3</sub>[1]).** Rb<sub>8</sub>K<sub>2</sub>[Ru<sub>4</sub>O<sub>4</sub>(OH)<sub>2</sub>(H<sub>2</sub>O)<sub>4</sub>(SiW<sub>10</sub>O<sub>36</sub>)<sub>2</sub>]•25H<sub>2</sub>O (57 mg, 8.54 μmol) was dissolved in water (10 mL). Excess solid NBu<sub>4</sub>NO<sub>3</sub> (1.00 g, 3.29 mmol) was added, resulting in precipitation of a dark brown solid. This was recovered by filtration, washed with H<sub>2</sub>O (3 × 10 mL) and air dried, before reprecipitation from MeCN/Et<sub>2</sub>O yielded TBA<sub>7</sub>H<sub>3</sub>[1]•5H<sub>2</sub>O as a dark brown solid (43 mg, 69%). FTIR (KBr disc) v cm<sup>-1</sup>: 3447 m, 2962 s, 2874 m, 1636 m, 1484 m, 1380 m, 1152 w, 1108 w, 1062 w, 1009 w, 967 s, 919 vs, 883 s, 803 vs, 764 sh, 549 w. UV-vis (MeCN), λ nm (ε 10<sup>3</sup> M<sup>-1</sup> cm<sup>-1</sup>): 269 (98.6), 460 (22.2). Elemental analysis for C<sub>112</sub>H<sub>275</sub>N<sub>7</sub>O<sub>87</sub>Ru<sub>4</sub>Si<sub>2</sub>W<sub>20</sub> (TBA<sub>7</sub>H<sub>3</sub>[1]•5H<sub>2</sub>O) calcd (found) %: C 18.53 (18.22), H 3.82 (3.63), N 1.35 (1.51). TGA indicates a 2.2% mass loss by 200 °C (calcd 2.2% for H<sub>2</sub>O).

## 12.2 X-Ray Crystal Structure Determination

Suitable single crystals of H<sub>2</sub>2•C<sub>2</sub>H<sub>6</sub>O•8H<sub>2</sub>O were obtained by vapour diffusion of acetone into an aqueous solution of H<sub>2</sub>2. A crystal was selected under ambient conditions, mounted on a cryoloop using Paratone-N oil, and placed under the cryostream at 173 K. Crystal evaluation and collection of X-ray diffraction intensity data were performed using a Bruker Apex II CCD diffractometer (Cu K<sub>α</sub>, λ = 1.54178 Å), and data reduction was carried out using the Bruker *APEXII* program suite.<sup>9</sup> Correction for incident and diffracted beam absorption effects were applied using empirical methods.<sup>10</sup> H<sub>2</sub>2•C<sub>2</sub>H<sub>6</sub>O•8H<sub>2</sub>O crystallized in the space group *Pnna* as determined by systematic absences in the intensity data, intensity statistics and the successful solution and refinement of the structure. Structure solution and refinement was carried out using the Bruker SHELXTL software package.<sup>11</sup> The structure was solved by direct methods and refined against *F*<sup>2</sup> by the full matrix least-square technique. All non-H atoms were refined anisotropically and H atoms were included in calculated positions, H atoms on the -PO<sub>3</sub>H groups and included water could not be located and refined. The C-C distance in the included acetone molecule was restrained. The final CIF file was validated using the IUCr CheckCIF online service. Crystal data, data collection parameters and refinement statistics are listed in Table S4, bond lengths and angles in Table S1.

**Table S4** Crystal Data, Data Collection Parameters and Refinement Statistics for **H<sub>2</sub>•C<sub>2</sub>H<sub>6</sub>O•8H<sub>2</sub>O**

| Empirical formula                                 | C <sub>53</sub> H <sub>69</sub> N <sub>6</sub> O <sub>25</sub> P <sub>2</sub> Ru |
|---------------------------------------------------|----------------------------------------------------------------------------------|
| $F_w / \text{g mol}^{-1}$                         | 1353.15                                                                          |
| $T / \text{K}$                                    | 173(2)                                                                           |
| $\lambda / \text{Å}$                              | 1.54178                                                                          |
| Crystal system                                    | Orthorhombic                                                                     |
| Space group                                       | <i>Pnna</i>                                                                      |
| $a / \text{Å}$                                    | 21.3561(4)                                                                       |
| $b / \text{Å}$                                    | 19.4016(3)                                                                       |
| $c / \text{Å}$                                    | 14.9635(2)                                                                       |
| $\alpha / ^\circ$                                 | 90                                                                               |
| $\beta / ^\circ$                                  | 90                                                                               |
| $\gamma / ^\circ$                                 | 90                                                                               |
| $V / \text{Å}^3$                                  | 6200.0(2)                                                                        |
| $Z$                                               | 4                                                                                |
| $\rho_{\text{calc}} / \text{g cm}^{-3}$           | 1.450                                                                            |
| $\mu / \text{mm}^{-1}$                            | 3.271                                                                            |
| Crystal size / mm <sup>3</sup>                    | 0.80 × 0.20 × 0.20                                                               |
| No. reflections (unique)                          | 50722 (5616)                                                                     |
| $R_{\text{int}}$                                  | 0.0385                                                                           |
| $\theta_{\text{max}}$                             | 69.17                                                                            |
| Completeness to $\theta_{\text{max}}$             | 96.8%                                                                            |
| Data / restraints / parameters                    | 5616 / 1 / 404                                                                   |
| Goodness-of-fit on $F^2$                          | 1.108                                                                            |
| Residuals: $R_1$ ; $wR_2^a$                       | 0.0680; 0.1922                                                                   |
| Final difference peak and hole / eÅ <sup>-3</sup> | 1.000; -0.704                                                                    |

$$^a R_1 = \sum ||F_o| - |F_c|| / \sum |F_o|. \quad wR_2 = \{ \sum [w(F_o^2 - F_c^2)^2] / \sum [w(F_o^2)^2] \}^{1/2}.$$

### 12.3 Laser Photophysical Measurements

**Ultrafast Visible Transient Absorption.** The femtosecond transient absorption spectrometer is based on a regeneratively amplified Ti:sapphire laser system (coherent Legend, 800 nm, 150 fs, 3 mJ/pulse and 1 kHz repetition rate) and a Helios spectrometer (Ultrafast Systems LLC). The excitation pulse at 400 nm was generated by doubling the frequency of the fundamental 800 nm pulse using a  $\beta$ -barium borate (BBO) type I crystal. The energy of the 400 nm pump pulse was set to ~250 nJ/pulse with a neutral density filter. The pump beam diameter at the sample was ~400  $\mu\text{m}$ , corresponding to an excitation density of ~2  $\mu\text{J}/\text{cm}^2$  per pulse. A white light continuum (WLC) (450~720 nm), used as a probe, was generated by attenuating and focusing 10  $\mu\text{J}$  of the fundamental 800 nm pulse into a sapphire window. This WLC was split in two parts used as a probe and reference beams. The probe beam was focused with an aluminium parabolic reflector into the sample with a beam diameter of ~150  $\mu\text{m}$ . The reference and probe beams were focused into a fiber-coupled multichannel spectrometer with CMOS sensors and detected at a frequency of 1 kHz. To minimize low-frequency laser fluctuations every other pump pulse was blocked with a synchronized chopper (New Focus Model 3501) at 500 Hz, and the absorbance change was calculated with two adjacent probe pulses (pump-blocked and pump-unblocked). The delay between the pump and probe pulses was controlled by a motorized translational stage. Samples were mounted on a stage and constantly moved by a controller throughout the measurements to avoid the destruction of samples. In all transient absorption spectra, the chirp and time zero correction were performed with Surface Explorer software (v.1.1.5, Ultrafast Systems LCC). The typical instrument response of our spectrometer is well represented by a Gaussian function with a full width at half-maximum (FWHM) of  $180 \pm 10$  fs.

**Nanosecond Transient Absorption.** Measurements at the ns to  $\mu\text{s}$  timescales were carried out in an EOS spectrometer (Ultrafast Systems LLC). The pump pulses at 400 nm were generated from the same laser system described above. The probe pulse, a 0.5 ns white-light source operating at 20 kHz, was synchronized with the femtosecond amplifier, and the delay time was controlled by a digital delay generator. The probe light was detected in a fiber-optic-coupled multichannel spectrometer with a complementary metal–oxide–semiconductor (CMOS) sensor. The absorbance change was calculated from the intensities of sequential probe pulses with and without the pump.

**Ultrafast Visible Pump/IR Probe Transient Absorption.** Our tunable femtosecond infrared spectrometer is based on a Clark IR optical parametric amplifier (OPA) which generates two tunable near-IR pulses in the 1.1 to 2.5  $\mu\text{m}$  spectral range (signal and idler, respectively). The broad mid-IR pulses centered at  $2000\text{ cm}^{-1}$  were generated by difference frequency generation (DFG) combining the corresponding signal and idler in a 1-mm-thick type II AgGaS<sub>2</sub> crystal. Frequency tuning of the mid-IR pulses was achieved by changing the signal and idler frequencies at the OPA and optimizing the timing between the pulses and the phase matching angles of the BBO (OPA crystal) and the AgGaS<sub>2</sub> crystal. After difference frequency generation, the mid-IR pulse was collimated and split in two parts with a 90% beam splitter. The 10% transmitted part was used as a probe in the visible pump-IR probe transient absorption measurements. To prevent cumulative heating in the sample and to avoid the saturation of the detector, the intensity of the probe mid-IR pulse was attenuated using neutral density filters to approximately 40  $\mu\text{J}$ , before it was focused into a 0.4  $\mu\text{m}$  CaF<sub>2</sub> path-length cell containing the sample. At the focal point, the probe was spatially overlapped with the temporally delayed 400 nm with a pump beam with energy of about 2  $\mu\text{J}$  per pulse. To avoid rotational diffusion effects, the polarization angle of the excitation beams were controlled with a half-wave plate and set to the magic angle ( $54.7^\circ$ ) relative to the probe beam. The diameter of the pump and probe beams were 400 and 200  $\mu\text{m}$ , respectively. The mid-infrared probe pulse was spectrally dispersed with an imaging spectrograph (CVI, Digikrom 240) and imaged onto a 32-element infrared HgCdTe (MCT) array detector. The difference absorption spectra were calculated by subtracting the absorption spectrum of the excited sample from the absorption spectrum of the sample in the ground state by blocking every other pump pulse with a phase-locked optical chopper (New Focus) at 500 Hz. The instrument response function of our spectrometer was well represented by a Gaussian function with a  $230 \pm 10$  full width at half-maximum (FWHM) for the VIS-IR setup.

## 12.4 Photoelectrochemistry

**Set-Up.** A long (*ca.* 6 cm) FTO slide with a *ca.* 1.4  $\text{cm}^2$  ds-TiO<sub>2</sub> film was attached to some self-adhesive copper tape. A similar length platinized FTO film (Pt@FTO), also attached to self-adhesive copper tape, was then taped to this photoanode, with a *ca.* 1 mm thick spacer separating the two working surfaces (Figure S20). The sides of the assembly were sealed using Paraffin wax (we found Nair™ hair removal wax to be excellent for this purpose), leaving the bottom open for ingress of gas. The copper tape was connected to crocodile clips fed through a rubber stopper and the assembly inserted into the flat-fronted working compartment of a two compartment electrochemical cell which was then evacuated and back-filled with Ar. Degassed buffer was introduced by syringe and the reference and counter electrodes, connected to another rubber stopper with electrochemical feed-throughs, were introduced to the cell while under a constant stream of Ar. The entire assembly was degassed



for a further 5 to 10 minutes and the measurement performed under a slow, constant stream of Ar to prevent ingress of atmospheric O<sub>2</sub>. Using a bipotentiostat, the generator electrode was set to a bias potential of 0 mV vs Ag/AgCl, and the detector to -0.516 V (pH 5.8) or -0.600 V (pH 7.2). In some cases the background was reduced before measurement by running the detector for several periods of 60 s.

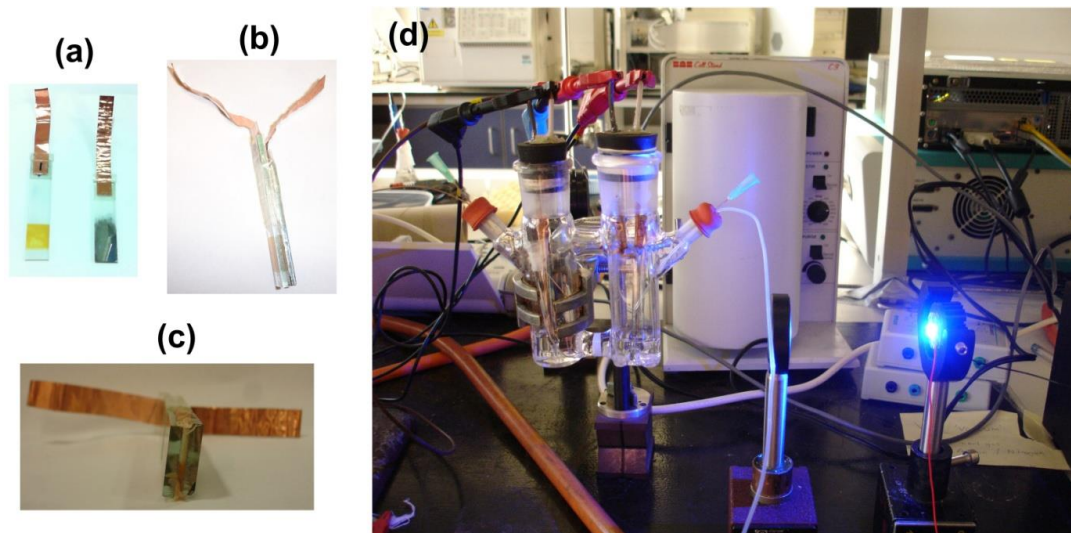

**Figure S20** The photoelectrochemical generator/detector set up: (a) Photoanode (left) and Pt@FTO detector (right) electrodes connected to copper tape; (b) Photoanode and detector taped together with *ca.* 1 mm spacing; (c) End view showing sealing of sides with wax and opening at the bottom for buffer ingress; (d) Photoelectrochemical cell under illumination with constant Ar purge.

**Detector Calibration.** The following procedure was used, which assumes that Pt@FTO has near 100% faradaic efficiency for oxygen evolution:

Two Pt@FTO films were held together, spaced by *ca.* 1 mm. The bipotentiostat was run with the generator at 0 mV, and the collector at the desired collector potential (-0.516 V at pH 5.8, -0.600 V at pH 7.2) for 180 s to achieve a steady background (Figure S21) current. Then the potential of the generator was stepped to +1.2 V (pH 5.8) or + 1.1 V (pH 7.2) for 360 s. To ensure measurement of faradaic currents, the generator and collector currents ( $I_g$  and  $I_c$ ) were measured after 120 s. The collector efficiency was then calculated as follows:

$$\text{Collector efficiency} = (|I_c - \text{background}|) / (|I_g - \text{background}|)$$

Over many calibration runs, this was consistently *ca.* 60% at both pHs.

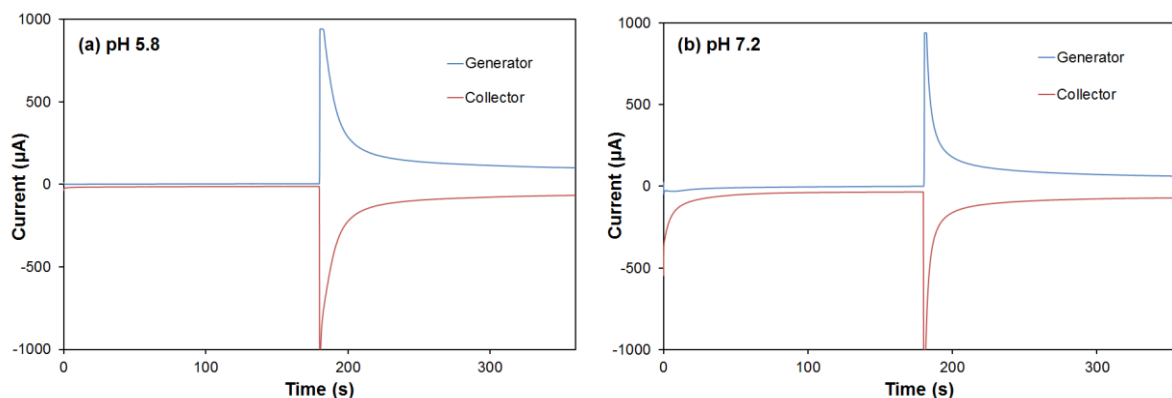

**Figure S21** Calibration experiments for the generator – collector assembly: (a) In pH 5.8 Na<sub>2</sub>SiF<sub>6</sub>/NaHCO<sub>3</sub> (with NaClO<sub>4</sub> added so that [Na<sup>+</sup>] = 200 mM), generator at +1.2 V, collector at -0.516 V; (b) In pH 7.2 lutidine (200 mM NaClO<sub>4</sub> electrolyte), generator at + 1.1 V, collector at -0.600 V.

**Detector background determination in PEC measurements.** A challenge in the photoelectrochemical measurements is correctly determining the detector background. If a Pt@FTO film with adequate sensitivity is used, the background signal is often similar or greater in magnitude than the measurement signal and tends to slope down as background O<sub>2</sub> is consumed. To estimate the background at the end of the transient, we took an average of the background immediately before the transient (*i.e.* 60 s before the end of the transient), and immediately before the next transient (60 s after the end of the transient) – in other words assuming a linear decay between the two points. This typically overestimates the background, and hence slightly underestimates faradaic efficiency. In some cases with low photocurrents and hence low collector currents (TiO<sub>2</sub>-P2 dyads), this underestimation of faradaic efficiency was severe enough that we instead used the current 60 s after the end of the transient alone to provide a background, likely leading to slight overestimates of faradic efficiency.

### 13. References

- 1 (a) A. Zaban, S. Ferrere, J. Sprague and B. A. Gregg, *J. Phys. Chem. B* 1997, **101**, 55. (b) C. X. She, J. C. Guo, S. Irle, K. Morokuma, D. L. Mohler, H. Zabri, F. Odobel, K. T. Youm, F. Liu, J. T. Hupp and T. Lian, *J. Phys. Chem. A* 2007, **111**, 6832.
- 2 Y. V. Geletii, B. Botar, P. Kögerler, D. A. Hillesheim, D. G. Musaev and C. L. Hill, *Angew. Chem. Int. Ed.* 2008, **47**, 3896.
- 3 X. Xiang, J. Fielden, W. Rodríguez-Córdoba, Z. Huang, N. Zhang, Z. Luo, D. G. Musaev, T. Lian and C. L. Hill, *J. Phys. Chem. C* 2013, **117**, 918.
- 4 C. R. Rice, A. Guerrero, Z. R. Bell, R. L. Paul, G. R. Motson, J. C. Jeffery, M. D. Ward, *New. J. Chem.* 2001, **25**, 185.
- 5 V. Penicaud, F. Odobel and B. Bujoli, *Tetrahedron Lett.* 1998, **39**, 3689.
- 6 (a) M. Montalti, S. Wahdwa, W. Y. Kim, R. A. Kipp and R. H. Schmehl, *Inorg. Chem.* 2000, **39**, 76. (b) I. Gillaizeau-Gauthier, F. Odobel, M. Alebbi, R. Argazzi, E. Costa, C. A. Bignozzi, P. Qu and G. J. Meyer, *Inorg. Chem.* 2001, **40**, 6073.
- 7 I. P. Evans, A. Spencer and G. Wilkinson, *J. Chem. Soc., Dalton Trans.* 1973, 204.
- 8 C. H. Yoon, R. Vittal, J. Lee, W.-S. Chae, K.-J. Kim, *Electrochimica Acta*, 2008, **53**, 2890.
- 9 APEXII (Version 2.0-1), SAINT (Version 7.23A) and SADABS (Version 2004/1), Bruker AXS Inc.: Madison, WI, USA, 2005.
- 10 R. H. Blessing, *Acta Crystallogr.* 1995, **A51**, 33.
- 11 SHELXTL (v 6.1), Bruker AXS Inc.: Madison, WI, USA, 2000.
